# Supplementary material for: In Acute Myocardial Infarction Liver Parameters Are Associated With Stenosis Diameter
Source: PubMed Central journal article supplement — Medicine (Baltimore). 2016 Feb 12;95(6):e2807. doi: 10.1097/MD.0000000000002807 (PMC4753945; doi:10.1097/md.0000000000002807), 2016-02-12
Supplement: medi-95-e2807-s001.pdf [file medi-95-e2807-s001.pdf]

**Supplementary Figure 1. Visualization of patient recruitment and exclusion.** Initially all patients were screened, who presented to the Department of Cardiology with troponin serum concentrations above the 99<sup>th</sup> percentile of the upper reference range, between 2009 and 2014. All patients were excluded, who did not undergo coronary angiography in the catheterization laboratory of the West German Heart and Vascular Centre Essen, University Hospital Essen. All patients who did not fulfill the study criteria or who exhibited any exclusion criteria were excluded from analysis. <sup>1</sup>: Exclusion criteria were a high grade aortic valve disease, cardiomyopathy, cardiac allograft vasculopathy, endocarditis, hypertensive emergency, myocarditis, pericarditis, tachyarrhythmia absoluta by atrial fibrillation, coronary vasospasm, and survival of sudden cardiac death. Patients with a coronary artery disease after coronary artery bypass graft were excluded. Patients with non-cardiac reasons of troponin elevation were excluded: acute neurological disease (including stroke or cerebral haemorrhage), acute pulmonary embolism, aortic dissection, diseases like amyloidosis, sarcoidosis, or scleroderma, inflammatory myopathies (i.e., polymyositis, dermatomyositis), sepsis, and patients, who were on cardio-toxic medication (adriamycin, 5-fluorouracil, herceptin).

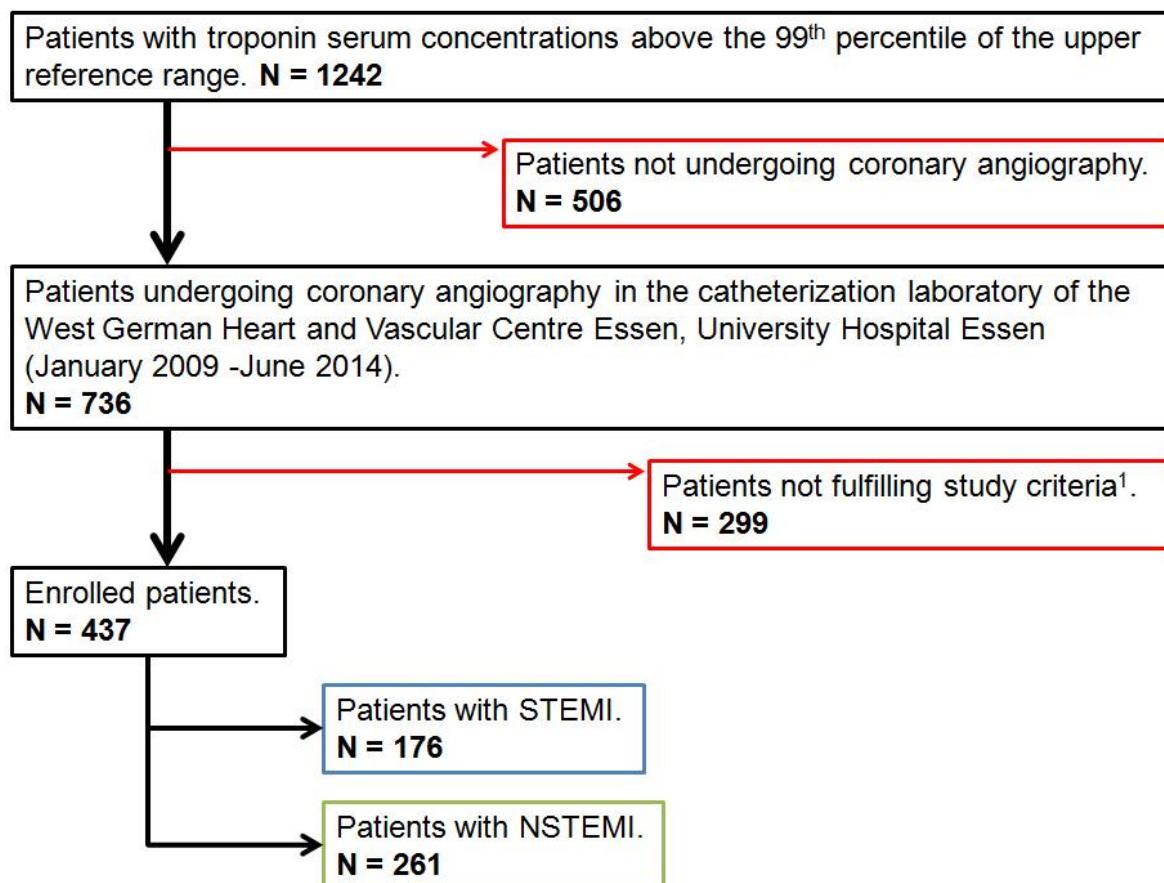

**Supplementary Figure 2. Correlation between minimal lumen diameter and percent diameter stenosis before stent implantation.** Linear regression (black line) between the decrease in percent diameter stenosis and minimal lumen diameter. MLD = minimal lumen diameter, SD = percent stenosis diameter.

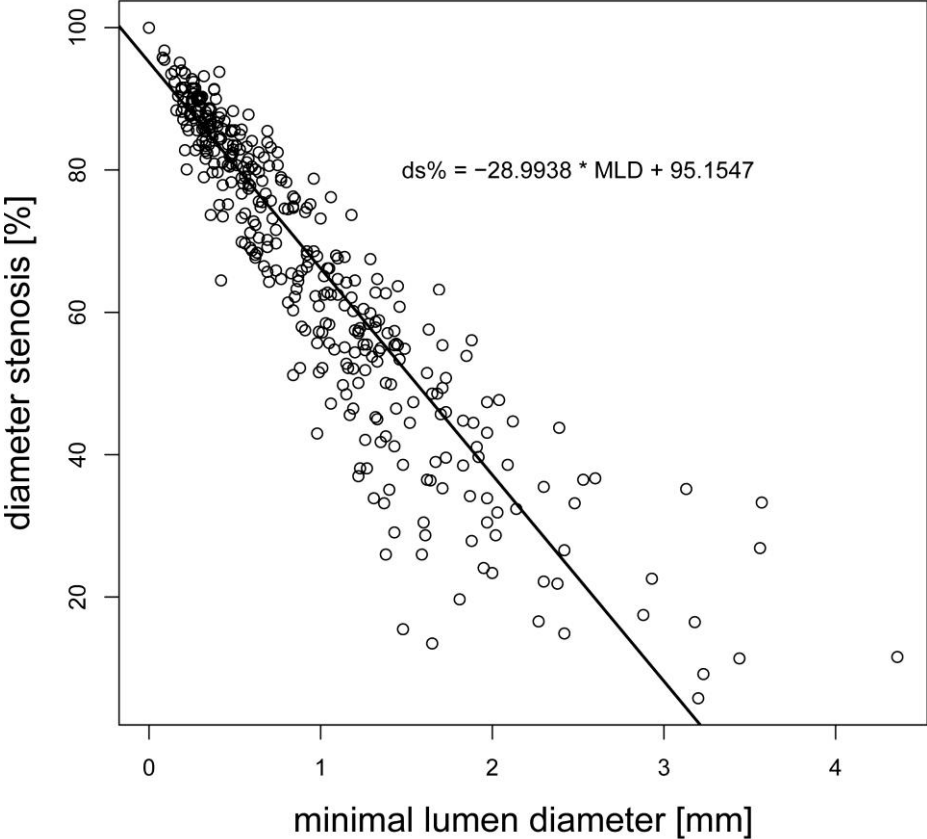

**Supplementary Table 1: Distribution of patients with elevated serum liver parameters by signs of cardiac or other etiology.**

| <b>Patients with AST or ALT above 100U/l (n=100)</b> |                                      |    |
|------------------------------------------------------|--------------------------------------|----|
| Signs of right heart burden (TTE)                    | No signs of right heart burden (TTE) |    |
| 12                                                   | 88                                   |    |
|                                                      | ALD                                  | 3  |
|                                                      | NAFLD                                | 3  |
|                                                      | hypercholesterolemia                 | 67 |
|                                                      | obesity                              | 59 |
|                                                      | None of the above                    | 6  |

ALD: alcoholic fatty liver disease, NAFLD: non-alcoholic fatty liver disease, TTE: transthoracic echocardiography
